# Supplementary material for: “Turn-on” and pinhole-free ultrathin core–shell Au@SiO2 nanoparticle-based metal-enhanced fluorescent (MEF) chemodosimeter for Hg2+
Source: Royal Society of Chemistry journal article supplement (doi:10.1039/d3na00746d), 2024-01-01
Supplement: d3na00746d1.pdf [file d3na00746d1.pdf]

*Electronic Supplementary Information for*

## **"Turn on" and pinhole-free ultrathin core-shell Au@SiO<sub>2</sub> nanoparticles-based metal-enhanced fluorescent chemodosimeter for Hg<sup>2+</sup>**

Ying Cui<sup>ab#</sup> & Shanji Fan<sup>c#</sup>, Yunran Zhai<sup>a</sup>, Yingjie Liu<sup>c</sup>, Junhua Li<sup>b</sup>, Jiawen Hu<sup>a</sup> and Lijia Wang<sup>d\*</sup>

<sup>a</sup>Hunan Key Laboratory of Two-Dimensional Materials, Advanced Catalytic Engineering Research Center of the Ministry of Education, and College of Chemistry and Chemical Engineering, Hunan University, Changsha 410082, China

<sup>b</sup>Key Laboratory of Functional Metal-Organic Compounds of Hunan Province, College of Chemistry and Materials Science, Hengyang Normal University, Hengyang, 421001, PR China

<sup>c</sup>Department of Thyroid Breast Surgery, The First Affiliated Hospital of University of South China, Hengyang, 421001, China.

### **1. Quantification the metal-enhanced fluorescence at the presence of Au@SiO<sub>2</sub> NPs**

To quantitatively estimate the fluorescence enhancement of the Au@SiO<sub>2</sub> NPs, their fluorescence enhancement factor (EF) is calculated using the following formula

$$EF = \frac{F_s/N_s}{F_0/N_0}$$

Here,  $F_s$  and  $F_0$  are the fluorescence intensities contributed by the fluorescence molecules adsorbed on Au@SiO<sub>2</sub> NPs ( $N_s$ ) and free molecules in solution ( $N_0$ ), respectively.  $N_A$  ( $\sim 5.94 \times 10^{15}$  for Au@SiO<sub>2</sub> NPs) can be estimated by measuring the UV-Vis spectra for the fluorescence probe solution before and after their immobilization onto the Au@SiO<sub>2</sub> NPs (Fig. S1).  $N_0$  ( $\sim 1.3 \times 10^{16}$ ) can be calculated by knowing the concentration of a bulk solution and its volume.

## 2. Supplementary Figures

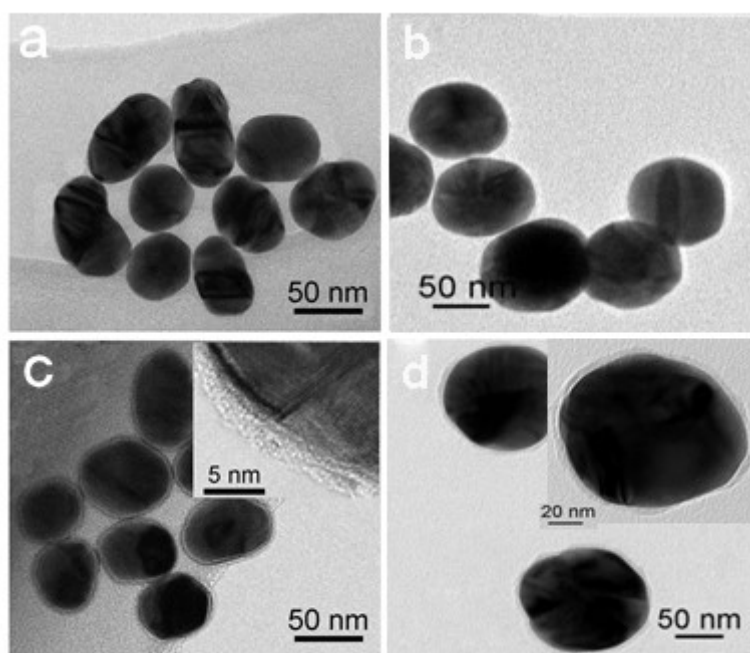

**Fig. S1** TEM images for the (a) 55 and (b) 80 nm Au NPs and (c and d) their corresponding Au@SiO<sub>2</sub> NPs with an external 4-5 nm SiO<sub>2</sub> shell.

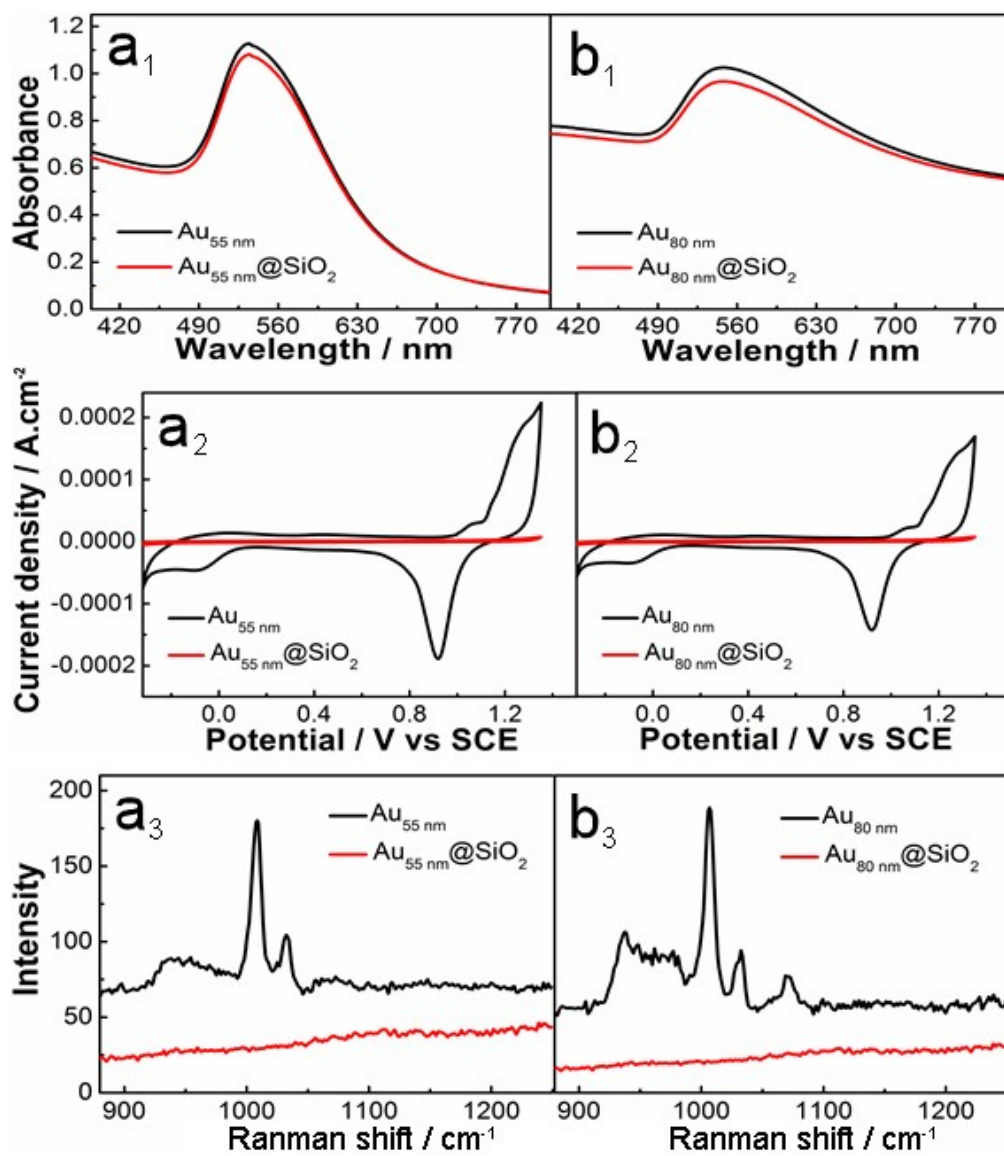

**Fig. S2** UV-Vis spectra (a<sub>1</sub>, b<sub>1</sub>), cyclic voltammograms (a<sub>2</sub>, b<sub>2</sub>), and SERS spectra (a<sub>3</sub>, b<sub>3</sub>) of 55 nm Au NPs  $\text{Au}_{55 \text{ nm}}@ \text{SiO}_2$ , the SERS spectra were obtained for a single 10 s accumulation. The characterizations for  $\text{Au}_{55 \text{ nm}}@ \text{SiO}_2$  and  $\text{Au}_{80 \text{ nm}}@ \text{SiO}_2$  NPs using UV-vis spectra, in 0.5 M  $\text{H}_2\text{SO}_4$  solution, scan rate: 0.1 V/s., and.

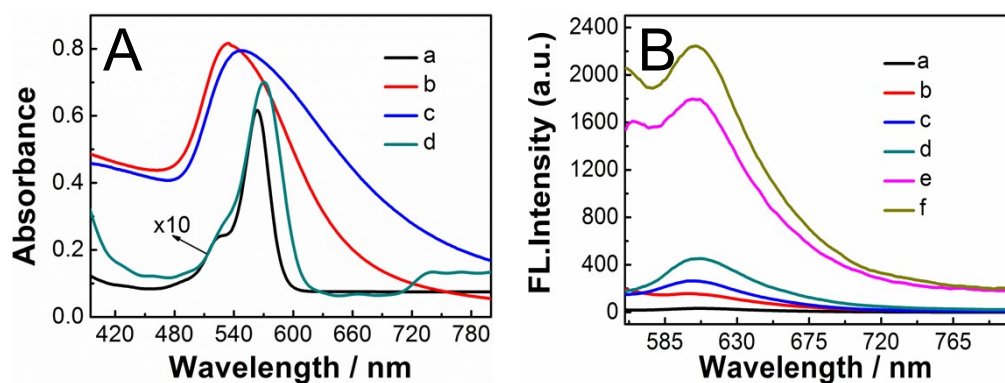

**Fig. S3** (A) The UV-vis spectra for the 0.5  $\mu\text{M}$  free fluorescence probe (a),  $\text{Au}_{55\text{ nm}}@SiO_2$  NPs (b),  $\text{Au}_{80\text{ nm}}@SiO_2$  NPs (c) and addition  $\text{Hg}^{2+}$  into free fluorescence probe (d), respectively. (B) The fluorescence spectra for free probe (a), fluorocore-labeled  $\text{Au}_{55\text{ nm}}@SiO_2$  probe (b),  $\text{Au}_{80\text{ nm}}@SiO_2$  probe (c) and the corresponding changes in fluorescence intensity after addition  $\text{Hg}^{2+}$  (d-f). The concentration of probe and  $\text{Hg}^{2+}$  are all 0.5  $\mu\text{M}$ .

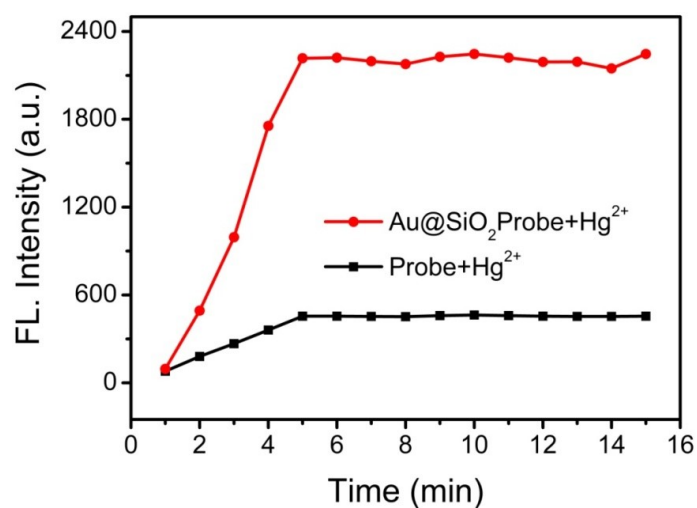

**Fig. S4.** Reaction time profiles of probe and  $\text{Au}@SiO_2$  probe (0.5  $\mu\text{M}$ ) upon addition of 1 equiv  $\text{Hg}^{2+}$  in pH 7.4 PBS/EtOH (v/v, 7/3). Excitation at 560 nm.

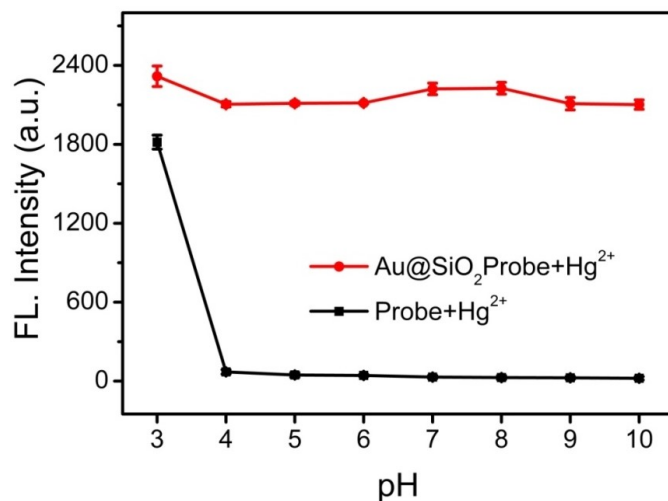

**Fig. S5.** Fluorescence intensity changes after additions of probe and Au@SiO<sub>2</sub> probe (0.5 μM) and Hg<sup>2+</sup>(1.0 equiv). The mixture were kept for 10 min at room temperature before the fluorescence intensity of the probe solution was measured. Excitation at 560 nm.

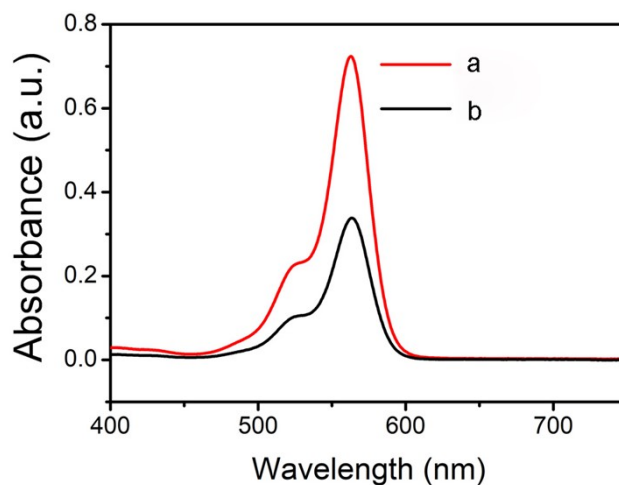

**Fig. S6.** UV-Vis spectra for the solution of the fluorescence probes(5 μM) before (a) and after (b) their immobilization onto the Au@SiO<sub>2</sub> NPs. For the later case, the Au@SiO<sub>2</sub> NPs were removed from the solution by centrifugation after immobilization of the fluorescence probes.

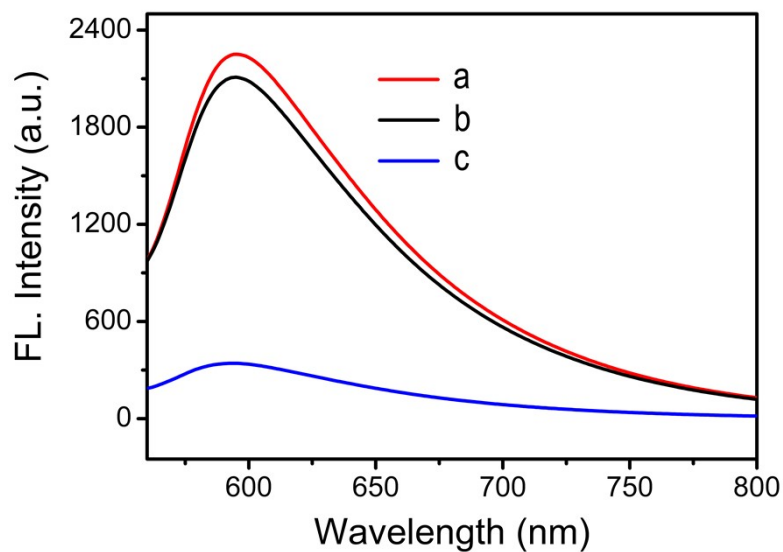

**Fig. S7.** Fluorescence spectra for the fluorophore-labeled Au@SiO<sub>2</sub> (a); Fluorescence spectra of Fluorescence spectra(b); Fluorescence intensity changes after additions of 1.0 equiv of the mixing solution with other heavy metal ions (Co<sup>2+</sup>, Fe<sup>3+</sup>, Cd<sup>2+</sup>, Fe<sup>2+</sup>, K<sup>+</sup>, Cr<sup>2+</sup>, Cu<sup>2+</sup>, Pb<sup>2+</sup>, Mg<sup>2+</sup>, Ag<sup>+</sup>, Ba<sup>2+</sup>, Ni<sup>2+</sup>) to the solution of Au@SiO<sub>2</sub> probe (0.5 μM) and Hg<sup>2+</sup>(1.0 equiv)(c).

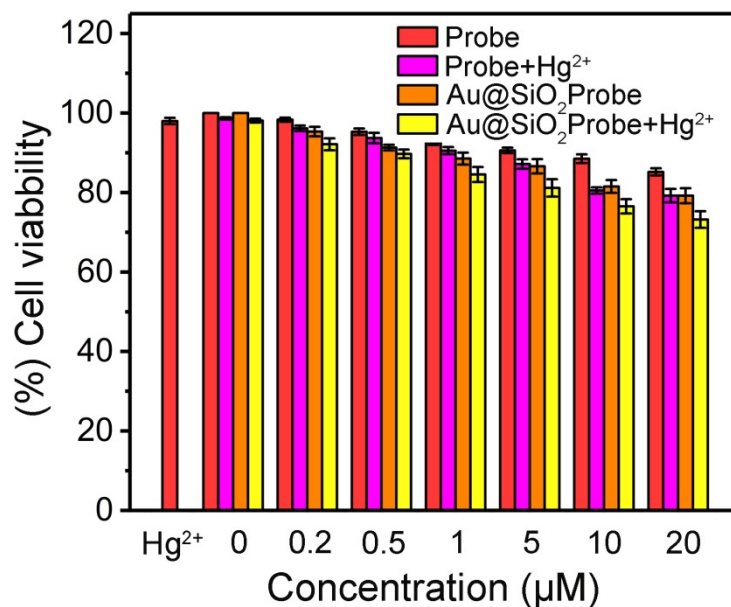

**Fig. S8.** Cytotoxicity assay of probe and Au@SiO<sub>2</sub> probe with 1.8 equiv Hg<sup>2+</sup> at different concentrations for HCT116 Colon cancer cells.
